# Supplementary material
Source: PubMed Central journal article supplement (PMC3808139)
Supplement: mt2013133x1.pdf [file mt2013133x1.pdf]

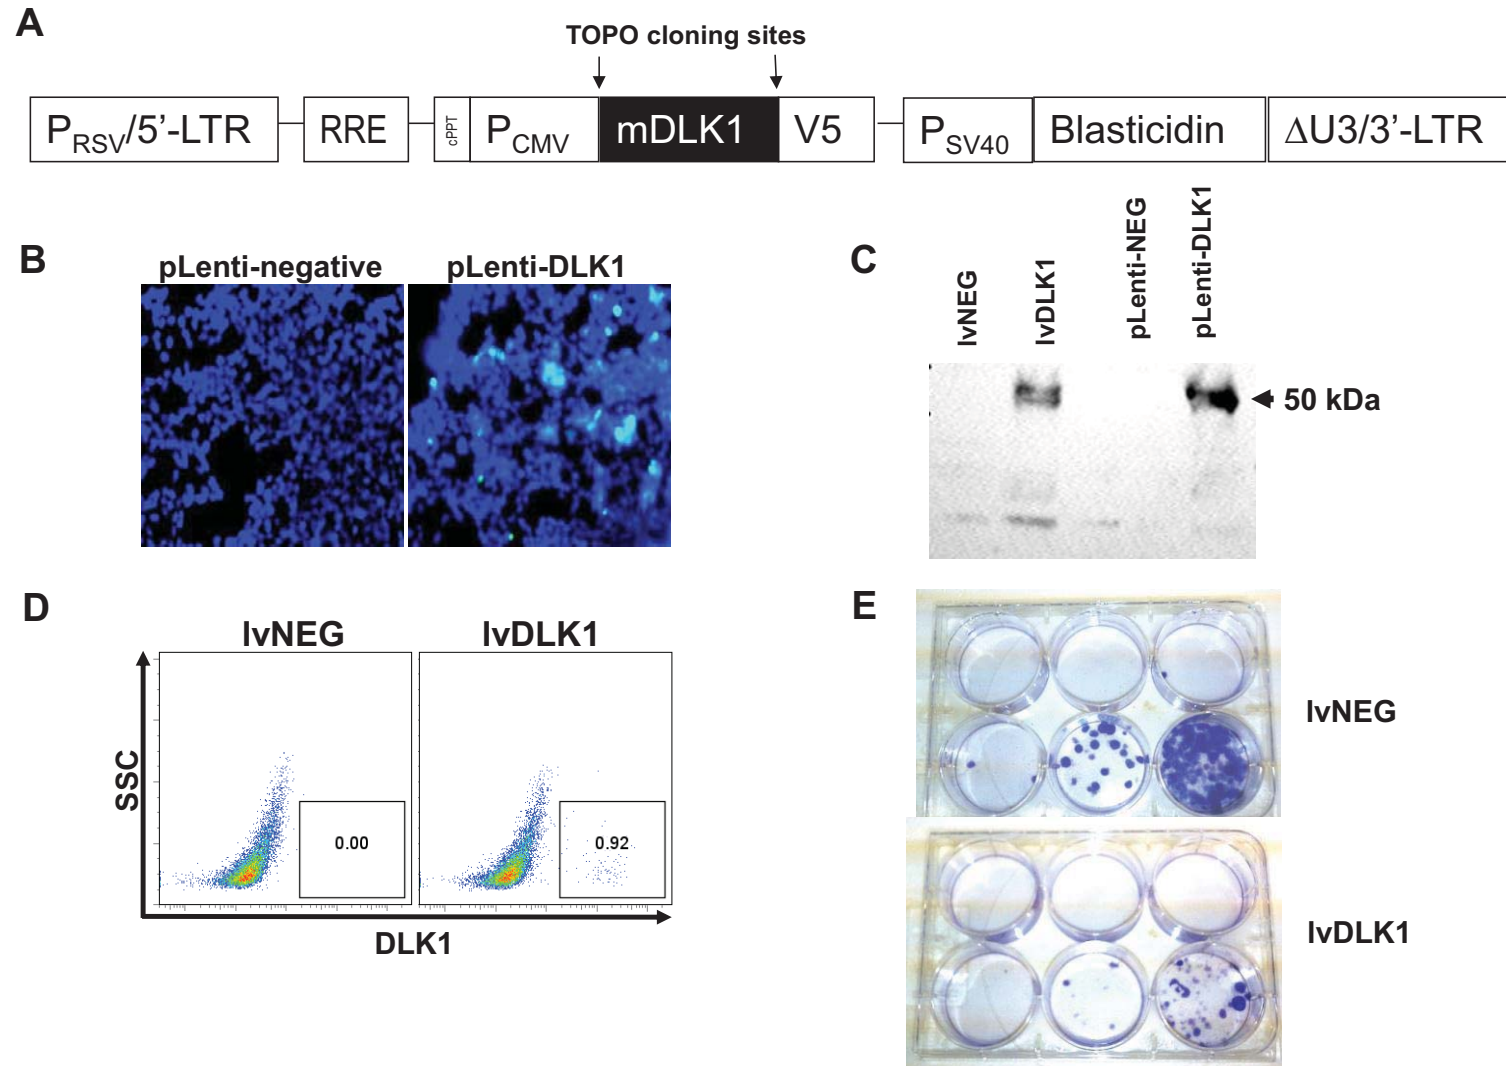

**Figure S1. Production of recombinant IvDLK1 and control IvNEG lentiviruses.** In **A**, a schematic diagram is provided for IvDLK1. pRSV/5'LTR, RSV LTR and HIV LTR chimeric promoter; RRE, Rev response element sequences; CMVp, CMV promoter used to drive transgene expression; whole mouse DLK1 gene with V5 reporter tag; SV40p-Blasticidin, SV40 virus promoter used to drive selection marker blasticidin gene expression;  $\Delta$ U3/HIV 3'LTR, promoter deleted in U3 region so that the Ivv become self-inactivated; TOPO cloning sites also indicated. 293T cells were transfected with plasmid DNA pLenti-DLK1 (or pLenti-NEG) and analyzed for V5 protein expression by immunofluorescence and western blot as shown in **B** and **C**. HT-1080 cells were infected with lentivirus and analyzed for V5 protein expression by western blot and DLK1 protein expression by flow cytometry as shown in **C** and **D**, respectively. In **E**, production of a live functional virus (IvNEG) is confirmed by the formation of blasticidin-resistant colonies of lentivirus-infected HT-1080 cells stained with crystal violet.

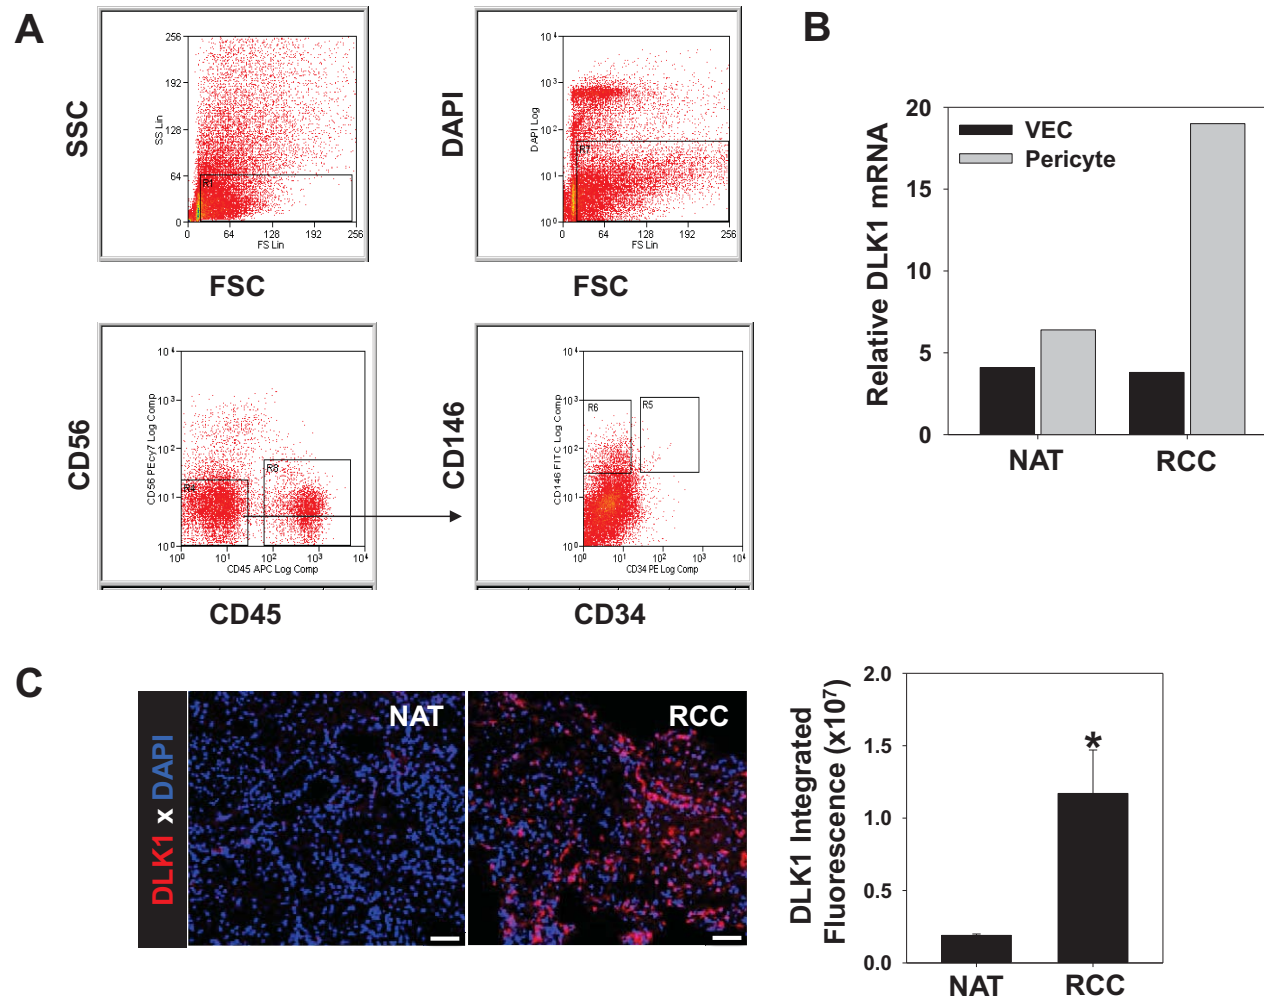

**Figure S2. DLK1 is differentially (over)expressed by human RCC-associated pericytes.** In **A**, Freshly-harvested RCC tumor and patient-matched normal adjacent kidney tissues (NAT) were mechanically and enzymatically digested into single-cell suspension and sorted by flow cytometry based on forward scatter and side scatter, DAPI exclusion (to exclude dead cells), a CD56<sup>neg</sup>CD45<sup>neg</sup> phenotype, and then selectively into CD146<sup>+</sup>CD34<sup>neg</sup> pericytes and CD146<sup>+</sup>CD34<sup>+</sup> VEC populations per Crisan *et al.*<sup>49</sup>. In **B**, mRNA was isolated from sorted pericytes and VEC from NAT and RCC tumor and analyzed for DLK1 expression by real-time PCR. Relative mRNA expression was normalized to housekeeping HPRT1 transcript expression. In **C**, RCC tumor and NAT sections were analyzed for expression of DLK1 (red) by immunofluorescence microscopy. Mean fluorescence intensity +/- SD was quantitated from 3 independent fields per slide as described in Materials and Methods. White ruler insets: 50 microns. Data are representative those obtained in 3 independent experiments performed. \*p < 0.05 (t-Test).
